# Supplementary material for: 3D hierarchical tubular micromotors with highly selective recognition and capture for antibiotics
Source: Royal Society of Chemistry journal article supplement (doi:10.1039/c9ta11730j), 2020-01-01
Supplement: c9ta11730j1.pdf [file c9ta11730j1.pdf]

*Electronic Supplementary Information*

**3D hierarchically tubular micromotors with highly selective recognition and capture for antibiotics**

Xingmei Bing<sup>a</sup>, Xiaolei Zhang<sup>a</sup>, Jia Li<sup>a\*</sup>, Dickon H.L. Ng<sup>b,c</sup>, Wenning Yang<sup>a</sup>, Jie Yang<sup>a</sup>

*a School of Material Science and Engineering, University of Jinan, Jinan, 250022, China.*

*b Department of Physics, The Chinese University of Hong Kong, Shatin, Hong Kong, China*

*c Key Laboratory of Materials Processing & Mold, Ministry of Education, Zhengzhou University, Zhengzhou, China;*

\*Email: [mse\\_lij@ujn.edu.cn](mailto:mse_lij@ujn.edu.cn)

**Table of Content**

**Section 1: Supporting Videos**

**Video S1:** The videos of the moving MMIPs-LDH/Mn<sub>3</sub>O<sub>4</sub> micromotor in 1%, 2%, 3%, 5% and 10% of H<sub>2</sub>O<sub>2</sub> solution, respectively. (0.5 % of sodium dodecyl sulfonate was added to 1%, 2% and 3% H<sub>2</sub>O<sub>2</sub> solution, respectively, while no dodecyl sulfonate addition was added to 5% and 10% H<sub>2</sub>O<sub>2</sub> solution)

**Video S2:** The video of the moving MMIPs-LDH/Mn<sub>3</sub>O<sub>4</sub> micromotor in 2% of H<sub>2</sub>O<sub>2</sub> without sodium dodecyl sulfonate under an external magnetic field.
